# Supplementary material for: Serological Evidence of SARS-CoV-2 Exposure in Domestic Dogs and Cats, Thailand: Detection of SARS-CoV-2 Omicron Variant in Dogs Living in COVID-19-Positive Households
Source: Transbound Emerg Dis. 2024 Feb 20;2024:9938523. doi: 10.1155/2024/9938523 (PMC12016992; doi:10.1155/2024/9938523)
Supplement: Supplementary Materials — Table S1: detail of SARS-CoV-2 survey in domestic dogs and cats during the COVID-19 outbreak from December 2021 to August 2022, Thailand. Table S2: genetic mutations of the whole genome of SARS-CoV-2 Omicron variant (BA.2) from dog and owner and reference viruses. [file 9938523.f1.docx]

**Supplement Materials**

**Serological evidence of SARS-CoV-2 exposure in domestic dogs and cats, Thailand:**

**detection of SARS-CoV-2 Omicron variant in dogs living**

**in COVID-19-positive households**

Supassama Chaiyawong1,2, Kamonpan Charoenkul1,2, Waleemas Jairak1,2,

Kitikhun Udom1,2, Ekkapat Chamsai1,2, Navapon Techakriengkrai 1,3,

Kamol Suwannakarn4, Alongkorn Amonsin1,2*

1Department of Veterinary Public Health, Faculty of Veterinary Science, Chulalongkorn University, Bangkok, 10330, Thailand

2Emerging and Re-emerging Infectious Diseases in Animals, Center of Excellence,

Faculty of Veterinary Science, Chulalongkorn University, Bangkok, 10330, Thailand

3Department of Veterinary Microbiology, Faculty of Veterinary Science, Chulalongkorn University, Bangkok, Thailand

4Department of Microbiology, Faculty of Medicine Siriraj Hospital, Mahidol University, Bangkok, Thailand

**Supplement tables**

**Supplement Table 1.** Detail of SARS-CoV-2 survey in domestic dogs and cats during the COVID-19 outbreak from December 2021 to August 2022, Thailand.

**Supplement Table 2.** Genetic mutations of the whole genome of SARS-CoV-2 Omicron variant (BA.2) from dog and owner and reference viruses

**Supplement Table 1.** Detail of SARS-CoV-2 survey in domestic dogs and cats during the COVID-19 outbreak from December 2021 to August 2022, Thailand.

| Month | COVID-19 Households | | | Unknown status Households | |
| --- | --- | --- | --- | --- | --- |
| #Household | Dog | Cat | Dog | Cat |
|  | #positive/#tested | #positive/#tested | #positive/#tested | #positive/#tested |
| Dec 2021 | 3 | 0/4 | 0/2 | 0/2 | 0/1 |
| Jan 2022 | 1 | 0/1 | 0/0 | 0/2 | 0/4 |
| Feb 2022 | 1 | 0/1 | 0/0 | 0/15 | 0/13 |
| Mar 2022 | 10 | 1/16 | 0/4 | 0/32 | 0/17 |
| Apr 2022 | 6 | 0/3 | 0/10 | 0/3 | 0/5 |
| May 2022 | 3 | 0/61 | 0/7 | 0/41 | 0/12 |
| Jun 2022 | 8 | 0/1 | 0/14 | 0/65 | 0/13 |
| July 2022 | 11 | 0/8 | 0/9 | 0/43 | 0/15 |
| Aug 2022 | 6 | 0/1 | 0/14 | 0/18 | 0/15 |
| **Total** | **49** | **1/96** | **0/60** | **0/221** | **0/95** |

**Supplement Table 2.** Genetic mutations of the whole genome of SARS-CoV-2 Omicron variant (BA.2) from dog and owner and reference viruses

| **Virus** | **Variant** | **Accession #** | **Country** | **Host** | **Date** | **ORF1ab** |  |  |  |  |  |  |
| --- | --- | --- | --- | --- | --- | --- | --- | --- | --- | --- | --- | --- |
|  |  |  |  |  |  | S135R | 141-143del | T842I | K856R | G1307S | SL2083I | A2710T |
| Wuhan-Hu-1 | Wild‐type | NC_045512.2 | China | Human | Dec-19 | S | no del | T | K | G | SL | A |
| Delta | Delta (B.1.617.2) |  |  | Human | Dec-20 | S | no del | T | K | G | SL | A |
| CU27791 | Delta (B.1.617.2.85) | EPI_ISL_5315539 | Thailand | Dog | Sep-21 | S | no del | T | K | G | SL | A |
| CU27516 | Delta (B.1.617.2.30) | EPI_ISL_5320246 | Thailand | Cat | Jul-21 | S | no del | T | K | G | SL | A |
| Omicron BA.1 | Omicron (B.1.1.529+BA.1) |  |  | Human | Nov-21 | S | no del | T | R | G | I | T |
| Omicron BA.2 | Omicron (B.1.1.529+BA.2) |  |  | Human | Dec-21 | R | no del | I | K | S | SL | A |
| Omicron BA.4 | Omicron (B.1.1.529+BA.4) |  |  | Human | Jan-22 | R | del | I | K | S | SL | A |
| Omicron BA.5 | Omicron (B.1.1.529+BA.5) |  |  | Human | Jan-22 | R | no del | I | K | S | SL | A |
| SUAT_19 | Omicron (B.1.1.529+BA.1.17) | EPI_ISL_11580576 | Spain | Cat | Jan-22 | S | no del | T | R | G | I | T |
| TX-014776-001 | Omicron (B.1.1.529+BA.2.3.4) | EPI_ISL_13101428 | USA | Dog | Apr-22 | R | no del | I | K | S | SL | A |
| *CU28424 | Omicron (B.1.1.529+BA.2) |  | Thailand | Dog | Mar-22 | R | no del | N/A | N/A | N/A | SL | A |
| *CUh10001 | Omicron (B.1.1.529+BA.2) |  | Thailand | Human | Mar-22 | R | no del | I | K | S | SL | A |
|  |  |  |  |  |  |  |  |  |  |  |  |  |
| **Virus** | **Variant** | **ORF1ab** |  |  |  |  |  |  |  |  |  |  |
|  |  | L3027F | T3090I | L3201F | T3255I | P3395H | 3675-3677del | I3758V | P4715L | R5716C | I5967V | T6564I |
| Wuhan-Hu-1 | Wild‐type | L | T | L | T | P | no del | I | P | R | I | T |
| Delta | Delta (B.1.617.2) | L | T | L | T | P | no del | I | P | R | I | T |
| CU27791 | Delta (B.1.617.2.85) | L | T | L | I | P | no del | I | L | R | I | T |
| CU27516 | Delta (B.1.617.2.30) | L | T | L | T | P | no del | I | L | R | I | T |
| Omicron BA.1 | Omicron (B.1.1.529+BA.1) | L | T | L | I | H | del | V | L | R | V | T |
| Omicron BA.2 | Omicron (B.1.1.529+BA.2) | F | I | F | I | H | del | I | L | C | V | I |
| Omicron BA.4 | Omicron (B.1.1.529+BA.4) | F | I | L | I | H | del | I | L | C | V | I |
| Omicron BA.5 | Omicron (B.1.1.529+BA.5) | F | I | L | I | H | del | I | L | C | V | I |
| SUAT_19 | Omicron (B.1.1.529+BA.1.17) | L | T | L | I | H | del | V | L | R | V | T |
| TX-014776-001 | Omicron (B.1.1.529+BA.2.3.4) | F | I | F | I | H | del | I | L | C | V | I |
| *CU28424 | Omicron (B.1.1.529+BA.2) | N/A | I | F | I | H | del | I | L | C | V | I |
| *CUh10001 | Omicron (B.1.1.529+BA.2) | F | I | F | I | H | del | I | L | C | V | I |
|  |  |  |  |  |  |  |  |  |  |  |  |  |
| Virus | Variant | **N** |  |  |  |  |  |  | **ORF3a** | **E** | **M** |  |
|  |  | P13L | 31-33del | P151S | R203K | G204R | 366del | S413R | T223I | T9I | D3G/N | Q19E |
| Wuhan-Hu-1 | Wild‐type | P | no del | P | R | G | no del | S | T | T | D | Q |
| Delta | Delta (B.1.617.2) | P | no del | P | M | G | no del | S | T | T | D | Q |
| CU27791 | Delta (B.1.617.2.85) | P | no del | P | M | G | no del | S | T | T | D | Q |
| CU27516 | Delta (B.1.617.2.30) | P | no del | P | M | G | no del | S | T | T | D | Q |
| Omicron BA.1 | Omicron (B.1.1.529+BA.1) | L | del | P | K | R | no del | S | T | I | G | E |
| Omicron BA.2 | Omicron (B.1.1.529+BA.2) | L | del | P | K | R | no del | R | I | I | D | E |
| Omicron BA.4 | Omicron (B.1.1.529+BA.4) | L | del | S | K | R | no del | R | I | I | D | E |
| Omicron BA.5 | Omicron (B.1.1.529+BA.5) | L | del | P | K | R | no del | R | I | I | N | E |
| SUAT_19 | Omicron (B.1.1.529+BA.1.17) | L | del | P | K | R | no del | S | T | I | G | E |
| TX-014776-001 | Omicron (B.1.1.529+BA.2.3.4) | L | del | P | K | R | no del | R | I | I | D | E |
| *CU28424 | Omicron (B.1.1.529+BA.2) | L | del | P | K | R | del | R | I | I | D | E |
| *CUh10001 | Omicron (B.1.1.529+BA.2) | L | del | P | K | R | del | R | I | I | D | E |
|  |  |  |  |  |  |  |  |  |  |  |  |  |
| Virus | Variant | **M** | **ORF6** | **ORF7b** | **ORF9b** |  |  |  |  |  |  |  |
|  |  | A63T | D61L | L11F | P10S | 27-29del |  |  |  |  |  |  |
| Wuhan-Hu-1 | Wild‐type | A | D | L | P | no del |  |  |  |  |  |  |
| Delta | Delta (B.1.617.2) | A | D | L | P | no del |  |  |  |  |  |  |
| CU27791 | Delta (B.1.617.2.85) | A | D | L | P | no del |  |  |  |  |  |  |
| CU27516 | Delta (B.1.617.2.30) | A | D | L | P | no del |  |  |  |  |  |  |
| Omicron BA.1 | Omicron (B.1.1.529+BA.1) | T | D | L | S | del |  |  |  |  |  |  |
| Omicron BA.2 | Omicron (B.1.1.529+BA.2) | T | L | L | S | del |  |  |  |  |  |  |
| Omicron BA.4 | Omicron (B.1.1.529+BA.4) | T | L | F | S | del |  |  |  |  |  |  |
| Omicron BA.5 | Omicron (B.1.1.529+BA.5) | T | D | L | S | del |  |  |  |  |  |  |
| SUAT_19 | Omicron (B.1.1.529+BA.1.17) | T | D | L | S | del |  |  |  |  |  |  |
| TX-014776-001 | Omicron (B.1.1.529+BA.2.3.4) | T | L | L | S | del |  |  |  |  |  |  |
| *CU28424 | Omicron (B.1.1.529+BA.2) | T | L | L | S | del |  |  |  |  |  |  |
| *CUh10001 | Omicron (B.1.1.529+BA.2) | T | L | L | S | del |  |  |  |  |  |  |
